# Supplementary material for: Improvement of Antioxidant Properties in Fruit from Two Blood and Blond Orange Cultivars by Postharvest Storage at Low Temperature
Source: MDPI journal article supplement (doi:10.3390/antiox11030547), 2022-03-14
Supplement: s1 [file s1]

| <b>Gene</b>   | <b>Acc. N<sup>oa</sup></b> | <b>Sequence</b>                                | <b>Sense</b> |
|---------------|----------------------------|------------------------------------------------|--------------|
| <i>PAL</i>    | DQ088064                   | GATTTGAGACATTTGGAGGA<br>ATGGATGAAGCTCTCCACTA   | S<br>AS      |
| <i>C4H</i>    | AF255013                   | CGTGGGAAGGCGAAGCT<br>TCACAAGCCCCAAGATTGGT      | S<br>AS      |
| <i>4CL</i>    | XM_006478851               | CCGAAACGCACCTCATCTG<br>TGATGCCGAGATTCGACAAA    | S<br>AS      |
| <i>CHS1</i>   | AB009350                   | GCAGCTATTGGTGTGGTTGG<br>GCACAACATAATTACTTCCCC  | S<br>AS      |
| <i>CHS2</i>   | AB009351                   | CCATCAGTATGTTTAGTAGTTC<br>GTTGCCCAAGTTTGGTGAC  | S<br>AS      |
| <i>CHI</i>    | AB011794                   | AACAAAGTCGCATTTCTCGGC<br>GCACGGCGTTCTCTCCAAGTA | S<br>AS      |
| <i>F3H</i>    | AB011795                   | CCCCTAATTTAAGGCTACCC<br>GACATCGTTCACGAAAACATAC | S<br>AS      |
| <i>F3'H</i>   | XM_024189673.1             | GGGGCCTGCGGATGGTTC<br>CCTC AACTCTAAGCTTGATAAG  | S<br>AS      |
| <i>F3'5'H</i> | HQ634392.1                 | GAATGGGGATTGTGCTTGTTG<br>CGAGGCGAGGCCGAAGC     | S<br>AS      |
| <i>FLS</i>    | AB011796.1                 | CCCGAAAAAGAACAGCCAGC<br>CACTCCCGGCTGGCTTC      | S<br>AS      |
| <i>DFR</i>    | AY519363                   | GCTGTTCGTGCTACTGTTC<br>GGCTAAATCGGCTTTCCATA    | S<br>AS      |
| <i>ANS</i>    | AY581048.1                 | GGGTGACTGCTAAATGTGTT<br>CAAGTCCCCTGTGAAGAATA   | S<br>AS      |
| <i>UFGT</i>   | AY519364                   | TCTTCAGCACTCCGCAAT<br>TCCATCGGATACGTCGTAAG     | S<br>AS      |
| <i>GST</i>    | EF597102.2                 | GCAGCAAAGTATGCAAACC<br>GTCATTGAAATTGTGTGCTTC   | S<br>AS      |

<sup>a</sup> Accession number.
